# Supplementary material for: Fc γ receptor IIIa/CD16a processing correlates with the expression of glycan-related genes in human natural killer cells
Source: PubMed Central journal article supplement (PMC7948478; doi:10.1074/jbc.ra120.015516), 2020-12-16
Supplement: mmc3.pdf [file mmc3.pdf]

**Supporting Information for**

**Fc  $\gamma$  receptor IIIa / CD16a processing correlates with the expression of glycan-related genes in human natural killer cells**

Kashyap R. Patel<sup>1†</sup>, Maria C. Rodriguez Benavente<sup>2†</sup>, W. Walter Lorenz<sup>3</sup>, Emily M. Mace<sup>4</sup>, Adam W. Barb<sup>2,5\*</sup>

**Table S1.** RNA-Seq data for N-glycan processing genes from three cell lines reporting the fold change in expression relative to primary human NK cells. “n.s.” denotes not significant at  $p\text{-adj} \leq 0.05$ .

| Gene       | HEK293F | p-adj<br>(FDR) | NK92   | p-adj<br>(FDR) | YTS    | p-adj<br>(FDR) | Magnitude of the<br>maximum change | Enzyme Product                                 |
|------------|---------|----------------|--------|----------------|--------|----------------|------------------------------------|------------------------------------------------|
| B3GAT1     | 0.071   | 1.8E-04        | 0.0010 | 5.1E-16        | 9.3E-4 | 3.6E-16        | 1081                               | HNK1 synthesis                                 |
| B3GNT7     | 0.0024  | 2.0E-22        | 0.083  | 1E-04          | 0.0022 | 2.1E-22        | 458.7                              | LacNAc repeats                                 |
| B3GNT8     | n.s.    | n.s.           | n.s.   | n.s.           | 0.024  | 2.0E-02        | 40.9                               | LacNAc repeats                                 |
| B3GNT2     | 5.3     | 2.5E-18        | 0.61   | 2E-02          | n.s.   | n.s.           | 5.3                                | LacNAc repeats                                 |
| B4GALNT3   | 29      | 2.0E-07        | 80     | 9E-12          | n.s.   | n.s.           | 79.7                               | Branch GalNAc                                  |
| B4GALNT4   | 77      | 1.0E-08        | n.s.   | n.s.           | n.s.   | n.s.           | 76.9                               | Branch GalNAc                                  |
| B4GALT2    | 19      | 2.2E-22        | 19     | 1E-21          | 14     | 1.2E-17        | 19.3                               | Branch Gal                                     |
| B4GALT1    | 0.067   | 7.9E-18        | 0.11   | 6E-13          | 0.12   | 7.1E-12        | 14.9                               | Branch Gal                                     |
| B4GALT4    | n.s.    | n.s.           | 0.19   | 3E-02          | 0.17   | 1.8E-02        | 6.1                                | Branch Gal                                     |
| B4GALT3    | 0.72    | 4.9E-02        | 1.4    | 5E-02          | n.s.   | n.s.           | 1.4                                | Branch Gal                                     |
| FUT9       | 332     | 5.9E-05        | 24     | 5E-02          | n.s.   | n.s.           | 332.0                              | Branch Fuc ( $\alpha$ 1-3/4)                   |
| FUT4       | n.s.    | n.s.           | 0.068  | 2E-03          | 0.0077 | 3.8E-07        | 129.9                              | Branch Fuc ( $\alpha$ 1-3/4)                   |
| FUT5       | n.s.    | n.s.           | 0.044  | 4E-02          | n.s.   | n.s.           | 22.6                               | Branch Fuc ( $\alpha$ 1-3/4)                   |
| FUT7       | 0.048   | 1.2E-04        | n.s.   | n.s.           | 20     | 1.2E-05        | 20.7                               | Branch Fuc ( $\alpha$ 1-3/4)                   |
| FUT11      | 0.12    | 5.4E-10        | n.s.   | n.s.           | n.s.   | n.s.           | 8.3                                | Branch Fuc ( $\alpha$ 1-3/4)                   |
| FUT1       | 6.6     | 2.9E-03        | n.s.   | n.s.           | n.s.   | n.s.           | 6.6                                | Branch Fuc ( $\alpha$ 1-2)                     |
| FUT8       | n.s.    | n.s.           | n.s.   | n.s.           | 3.2    | 2.1E-05        | 3.2                                | Core Fuc ( $\alpha$ 1-6)                       |
| MAN2A2     | 0.38    | 4.4E-02        | 0.009  | 2E-25          | n.s.   | n.s.           | 111.8                              | GlcNAc Man3 glycoform                          |
| MAN1A2     | 0.26    | 5.5E-10        | 0.32   | 2E-07          | 0.43   | 2.7E-04        | 3.9                                | Man5 glycoform                                 |
| MAN1A1     | n.s.    | n.s.           | n.s.   | n.s.           | 0.35   | 1.1E-03        | 2.9                                | Man5 glycoform                                 |
| MGAT4A     | 0.16    | 1.4E-04        | 0.0018 | 7E-37          | 0.032  | 2.7E-13        | 561.4                              | Branch ( $\beta$ 1-4GlcNAc to $\alpha$ 1-3Man) |
| MGAT5      | n.s.    | n.s.           | n.s.   | n.s.           | 0.008  | 3.7E-35        | 124.6                              | Branch ( $\beta$ 1-6GlcNAc to $\alpha$ 1-6Man) |
| MGAT3      | 19      | 1.5E-03        | n.s.   | n.s.           | n.s.   | n.s.           | 19.1                               | bisecting GlcNAc                               |
| MGAT5B     | 16      | 3.8E-03        | n.s.   | n.s.           | 17     | 3.5E-03        | 16.7                               | Branch ( $\beta$ 1-6GlcNAc to $\alpha$ 1-6Man) |
| MGAT1      | 0.23    | 2.9E-09        | n.s.   | n.s.           | n.s.   | n.s.           | 4.4                                | Branch (GlcNAc Man5)                           |
| ST3GAL6    | 62      | 1.1E-06        | 31     | 1E-04          | 0.065  | 1.4E-02        | 62.4                               | $\alpha$ 2,3 Neu5Ac                            |
| ST6GAL1    | 0.095   | 7.3E-11        | 0.066  | 7E-14          | 0.28   | 1.2E-03        | 15.2                               | $\alpha$ 2,6 Neu5Ac                            |
| ST3GAL5    | 0.13    | 3.1E-12        | 0.44   | 1E-02          | 0.25   | 5.2E-06        | 7.7                                | $\alpha$ 2,3 Neu5Ac                            |
| ST3GAL4    | 0.32    | 3.1E-04        | 0.19   | 2E-07          | 4.8    | 4.1E-07        | 5.2                                | $\alpha$ 2,3 Neu5Ac                            |
| ST3GAL1    | 0.22    | 1.7E-11        | n.s.   | n.s.           | 1.8    | 1.8E-02        | 4.6                                | $\alpha$ 2,3 Neu5Ac                            |
| ST3GAL3    | n.s.    | n.s.           | n.s.   | n.s.           | 2.4    | 4.7E-02        | 2.4                                | $\alpha$ 2,3 Neu5Ac                            |
| ST3GAL2    | 0.45    | 1.9E-06        | 0.61   | 6E-03          | n.s.   | n.s.           | 2.2                                | $\alpha$ 2,3 Neu5Ac                            |
| ST6GALNAC6 | 0.073   | 2.1E-03        | 0.027  | 4E-05          | 0.025  | 3.5E-05        | 40.4                               | $\alpha$ 2,6 Neu5Ac to GalNAc                  |
| ST6GALNAC3 | 23      | 4.1E-06        | n.s.   | n.s.           | 31     | 5.7E-07        | 30.6                               | $\alpha$ 2,6 Neu5Ac to GalNAc                  |
| ST6GALNAC2 | 8.8     | 2.0E-03        | n.s.   | n.s.           | 0.12   | 8.1E-03        | 8.8                                | $\alpha$ 2,6 Neu5Ac to GalNAc                  |
| ST8SIA6    | 0.043   | 2.8E-10        | 0.0018 | 1E-25          | 0.13   | 7.1E-05        | 563.2                              | polysialic acid                                |
| ST8SIA2    | 377     | 5.9E-06        | n.s.   | n.s.           | 23     | 3.1E-02        | 376.9                              | polysialic acid                                |
| ST8SIA5    | 49      | 7.1E-03        | n.s.   | n.s.           | n.s.   | n.s.           | 49.0                               | polysialic acid                                |
| ST8SIA4    | 0.1     | 7.6E-07        | n.s.   | n.s.           | n.s.   | n.s.           | 7.1                                | polysialic acid                                |

**Table S2.** qPCR data for N-glycan processing genes from three cell lines reporting the fold change in expression relative to primary human NK cells. “n.s.” denotes not significant at  $p \leq 0.05$ .

| Gene    | HEK293F | p-value | NK92    | p-value | YTS     | p-value | Magnitude of the maximum change | Enzyme Product                                                         |
|---------|---------|---------|---------|---------|---------|---------|---------------------------------|------------------------------------------------------------------------|
| AGA     | 0.36    | 8.8E-03 | 0.12    | 1.6E-03 | 0.41    | 1.5E-02 | 8.3                             | catabolism of N-linked oligosaccharides                                |
| B3GNT8  | 0.53    | 1.4E-02 | 0.11    | 2.8E-04 | 0.05    | 2.1E-04 | 20.0                            | $\beta$ 1-3 GlcNAc in LacNAc repeats                                   |
| B3GNT3  | n.s.    | n.s.    | 0.24    | 2.2E-05 | n.s.    | n.s.    | 4.3                             | $\beta$ 1-3 GlcNAc in LacNAc repeats                                   |
| B3GNT2  | 0.29    | 1.2E-03 | 0.57    | 2.7E-04 | 0.4     | 4.0E-04 | 3.4                             | $\beta$ 1-3 GlcNAc in LacNAc repeats                                   |
| B4GALT2 | 37.09   | 1.4E-04 | 5.33    | 5.0E-06 | 3.34    | 1.4E-02 | 37.1                            | Branch $\beta$ 1-4Gal                                                  |
| B4GALT1 | 0.12    | 5.0E-06 | 0.06    | 2.0E-06 | 0.06    | 2.0E-06 | 16.7                            | Branch $\beta$ 1-4Gal                                                  |
| B4GALT3 | n.s.    | n.s.    | 0.52    | 2.4E-05 | 0.25    | 2.1E-05 | 4.0                             | Branch $\beta$ 1-4Gal                                                  |
| EDEM1   | 0.29    | 2.0E-06 | 0.62    | 1.8E-03 | 0.44    | 1.0E-06 | 3.4                             | ER-associated N-glycoprotein degradation                               |
| EDEM2   | 0.53    | 1.2E-03 | 0.41    | 1.7E-05 | 0.55    | 3.6E-03 | 2.4                             | ER-associated N-glycoprotein degradation                               |
| EDEM3   | n.s.    | n.s.    | n.s.    | n.s.    | n.s.    | n.s.    | n.s.                            | ER-associated N-glycoprotein degradation                               |
| FUCA2   | 6.84    | 5.7E-04 | 0.35    | 3.1E-03 | 0.01    | 3.5E-04 | 100.0                           | $\alpha$ 1-6Fuc hydrolysis from reducing-end GlcNAc                    |
| FUCA1   | 3.06    | 2.3E-03 | 0.38    | 6.9E-04 | 0.27    | 6.0E-06 | 3.7                             | $\alpha$ 1-6Fuc hydrolysis from reducing-end GlcNAc                    |
| FUT11   | 0.17    | 1.0E-06 | 0.14    | 1.0E-06 | 0.16    | 1.0E-06 | 7.1                             | Branch ( $\alpha$ 1-3/4)Fuc                                            |
| FUT8    | n.s.    | n.s.    | 0.24    | 9.0E-06 | 0.64    | 2.2E-02 | 4.2                             | Core ( $\alpha$ 1-6)Fuc                                                |
| GANAB   | 1.86    | 3.7E-02 | 0.82    | 3.3E-02 | 0.68    | 1.4E-03 | 1.9                             | ER-associated Glu hydrolysis                                           |
| GLB1    | 4.34    | 2.7E-04 | 0.53    | 1.9E-03 | 0.33    | 5.9E-04 | 4.3                             | terminal bGal hydrolysis                                               |
| GNPTAB  | 0.12    | 6.3E-03 | 0.19    | 9.1E-03 | 0.01    | 3.6E-03 | 100.0                           | Man-6-P biosynthesis                                                   |
| GNPTG   | n.s.    | n.s.    | n.s.    | n.s.    | n.s.    | n.s.    | n.s.                            | Man-6-P biosynthesis                                                   |
| HEXA    | n.s.    | n.s.    | 0.25    | 2.8E-05 | 0.14    | 6.0E-06 | 7.1                             | terminal HexNAc degradation                                            |
| HEXB    | n.s.    | n.s.    | 0.32    | 5.0E-05 | 0.28    | 1.1E-04 | 3.6                             | terminal HexNAc degradation                                            |
| Gene    | HEK293F | p-value | NK92    | p-value | YTS     | p-value | Magnitude of the maximum change | Enzyme Product                                                         |
| MAN2A2  | n.s.    | n.s.    | < 0.01* | 1.0E-06 | 0.24    | 1.0E-06 | 100.0                           | GlcNAc Man3 glycoform                                                  |
| MAN1C1  | n.s.    | n.s.    | 0.01    | 1.0E-06 | 0.02    | 1.0E-06 | 100.0                           | Man8 glycoform                                                         |
| MAN1A1  | 0.5     | 2.6E-02 | 0.33    | 5.7E-03 | 0.09    | 1.4E-03 | 11.1                            | Man5 glycoform                                                         |
| MAN2A1  | 0.66    | 5.1E-03 | 0.14    | 1.0E-06 | 0.13    | 1.0E-06 | 7.7                             | terminal $\alpha$ 1-3 and $\alpha$ 1-6Man hydrolysis in Man5 glycoform |
| MAN1B1  | n.s.    | n.s.    | 0.25    | 2.0E-06 | 0.16    | 1.0E-06 | 6.3                             | Man8 glycoform                                                         |
| MAN2B1  | n.s.    | n.s.    | 0.27    | 5.0E-06 | 0.22    | 4.4E-05 | 4.5                             | catabolism of N-linked oligosaccharides                                |
| MAN1A2  | n.s.    | n.s.    | n.s.    | n.s.    | n.s.    | n.s.    | n.s.                            | Man5 glycoform                                                         |
| MANBA   | n.s.    | n.s.    | 0.1     | 5.8E-04 | 0.09    | 5.2E-04 | 11.1                            | $\beta$ Man hydrolysis from non-reducing end of N-glycoproteins        |
| MGAT4A  | 0.09    | 6.6E-04 | < 0.01* | 4.0E-04 | < 0.01* | 4.1E-04 | 100.0                           | Branch ( $\beta$ 1-4GlcNAc to $\alpha$ 1-3Man)                         |
| MGAT5   | n.s.    | n.s.    | 0.05    | 2.0E-04 | < 0.01* | 1.5E-05 | 100.0                           | Branch ( $\beta$ 1-6GlcNAc to $\alpha$ 1-6Man)                         |
| MGAT3   | 65.43   | 3.3E-05 | n.s.    | n.s.    | 0.31    | 8.1E-02 | 65.4                            | bisecting GlcNAc                                                       |
| MGAT4C  | 37.46   | 5.0E-06 | 0.26    | 3.2E-05 | n.s.    | n.s.    | 37.5                            | Branch ( $\beta$ 1-4GlcNAc to a $\beta$ 1-2GlcNAc- $\alpha$ 1-3Man)    |
| MGAT5B  | 34.38   | 1.2E-04 | 0.26    | 4.8E-02 | 23.89   | 6.9E-03 | 34.4                            | Branch ( $\beta$ 1-6GlcNAc to $\beta$ 1-6Man and $\alpha$ 1-3Man)      |
| MGAT2   | n.s.    | n.s.    | 0.59    | 8.3E-03 | 0.27    | 9.4E-04 | 3.7                             | Second branch (GlcNAc Man5) in complex-type N-glycans                  |

| MGAT1      | 0.53    | 5.7E-04 | 0.68 | 2.9E-03 | 0.62 | 1.1E-03 | 1.9                             | First branch (GlcNAc Man5) in complex-type N-glycans                   |
|------------|---------|---------|------|---------|------|---------|---------------------------------|------------------------------------------------------------------------|
| MGAT4B     | 1.56    | 4.4E-02 | 0.65 | 2.7E-04 | 0.6  | 4.0E-05 | 1.7                             | Branch ( $\beta$ 1-4GlcNAc to a $\beta$ 1-2GlcNAc- $\alpha$ 1-3Man)    |
| MOGS       | n.s.    | n.s.    | 0.44 | 7.0E-06 | 0.16 | 1.0E-06 | 6.3                             | distal $\alpha$ 1-2Glu hydrolysis from Man9 glycoform                  |
| NAGPA      | 0.43    | 2.2E-02 | 0.32 | 4.4E-04 | 0.08 | 7.8E-05 | 12.5                            | Man-6-P biosynthesis                                                   |
| NEU4       | 0.28    | 4.1E-02 | 0.08 | 1.6E-02 | 0.1  | 2.4E-02 | 12.5                            | terminal $\alpha$ 2-3, $\alpha$ 2-6, and $\alpha$ 2-8Neu5Ac hydrolysis |
| NEU1       | 4.41    | 6.2E-03 | n.s. | n.s.    | 0.39 | 2.0E-04 | 4.4                             | terminal $\alpha$ 2-3 and $\alpha$ 2-6Neu5Ac hydrolysis                |
| NEU2       | n.s.    | n.s.    | 0.26 | 2.8E-05 | n.s. | n.s.    | 4.3                             | terminal $\alpha$ 2-3, $\alpha$ 2-6, and $\alpha$ 2-8Neu5Ac hydrolysis |
| Gene       | HEK293F | p-value | NK92 | p-value | YTS  | p-value | Magnitude of the maximum change | Enzyme Product                                                         |
| NEU3       | 1.85    | 3.6E-03 | 0.82 | 1.7E-02 | 0.51 | 2.0E-03 | 2.0                             | terminal $\alpha$ 2-3, $\alpha$ 2-6, and $\alpha$ 2-8Neu5Ac hydrolysis |
| PRKCSH     | n.s.    | n.s.    | 0.35 | 4.9E-04 | 0.26 | 2.2E-04 | 3.8                             | $\alpha$ 1-3Glu hydrolysis from Man9 glycoform                         |
| ST6GAL1    | 0.29    | 1.6E-04 | 0.12 | 4.0E-06 | 0.3  | 2.5E-05 | 8.3                             | $\alpha$ 2,6 Neu5Ac                                                    |
| ST3GAL1    | 0.31    | 2.4E-04 | 0.22 | 1.0E-06 | 0.4  | 1.6E-04 | 4.5                             | $\alpha$ 2,3 Neu5Ac                                                    |
| ST3GAL2    | 0.64    | 3.3E-03 | 0.4  | 1.7E-05 | 0.68 | 6.1E-03 | 2.5                             | $\alpha$ 2,3 Neu5Ac                                                    |
| ST6GALNAC1 | 45.36   | 1.8E-04 | 0.36 | 5.1E-05 | n.s. | n.s.    | 45.4                            | $\alpha$ 2,6Neu5Ac to O-glycoproteins                                  |
| ST8SIA2    | 368.06  | 9.2E-05 | 0.26 | 3.2E-05 | n.s. | n.s.    | 368.1                           | polysialic acid                                                        |
| ST8SIA6    | 0.06    | 5.3E-03 | 0.01 | 3.6E-03 | 0.07 | 5.2E-03 | 100.0                           | polysialic acid                                                        |
| ST8SIA4    | 0.2     | 1.2E-02 | 1.9  | 7.7E-03 | 0.33 | 3.4E-02 | 5.0                             | polysialic acid                                                        |
| ST8SIA3    | n.s.    | n.s.    | 0.26 | 3.2E-05 | n.s. | n.s.    | 4.3                             | polysialic acid                                                        |
| UGGT2      | 12.08   | 1.3E-03 | n.s. | n.s.    | 0.01 | 9.0E-03 | 100.0                           | Protein folding quality control<br>ER-associated reglucosylation       |
| UGGT1      | n.s.    | n.s.    | 0.29 | 1.1E-04 | 0.16 | 7.4E-05 | 6.3                             | Protein folding quality control<br>ER-associated reglucosylation       |

\* values indicate very low abundance.

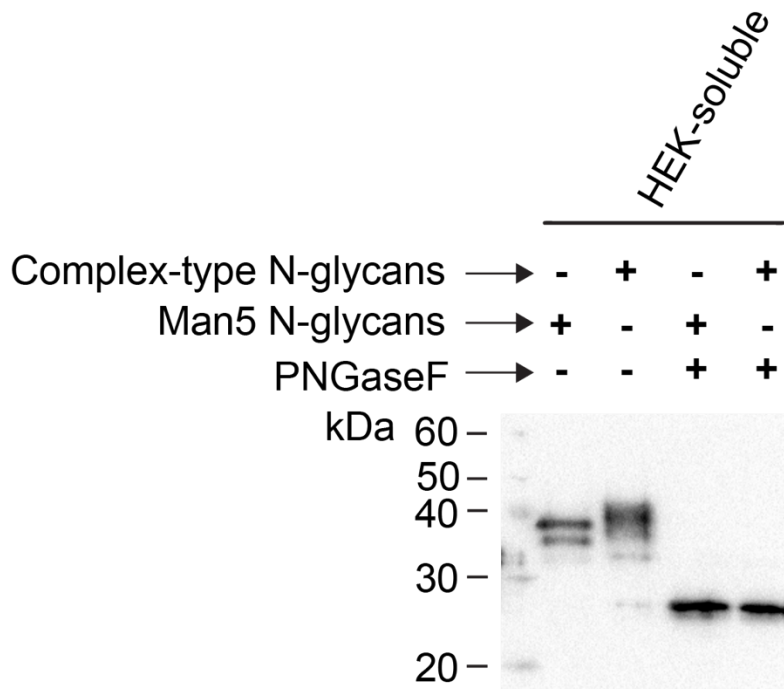

**Figure S1.** Expression of HEK-soluble CD16a using two different cell lines produces protein with predominantly oligomannose (Man5) N-glycans (HEK293S) or complex type N-glycans (HEK293F). Digestion with PNGase F indicates no differences in polypeptide mobility following N-glycan removal, though the polypeptide does migrate more slowly than expected based on mass (20 kDa).

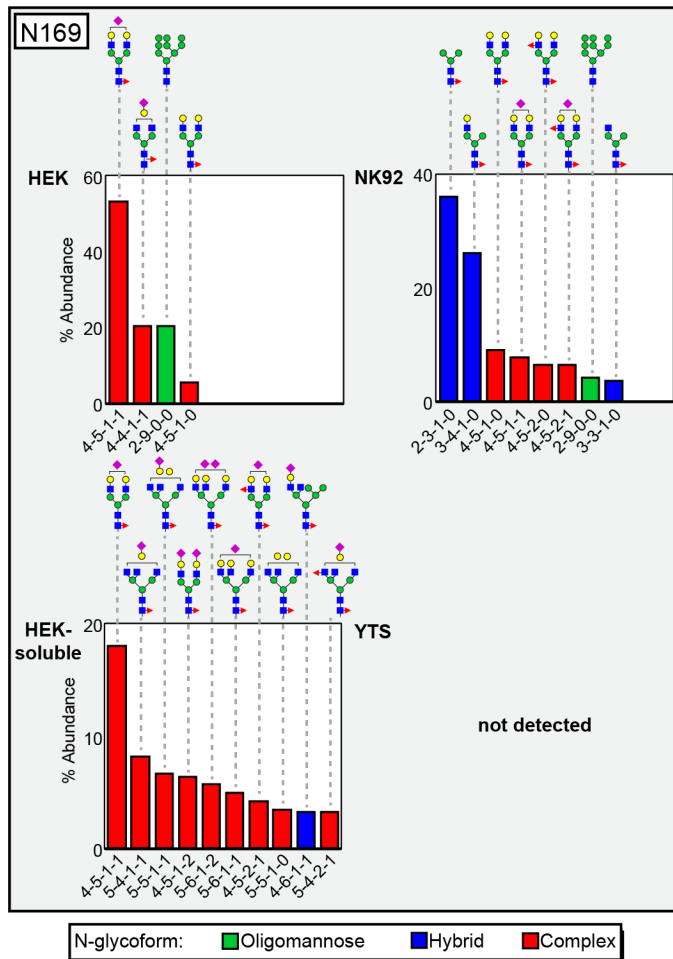

**Figure S2.** The top ten most abundant glycoforms at the CD16a N169 site. Cartoon diagrams represent one possible configuration; isobaric ions were not distinguished. The composition of each N-glycan is provided below the chart with numbers of N-acetylhexosamine, hexose, deoxyhexose, and N-acetylneuraminic acid residue, respectively.

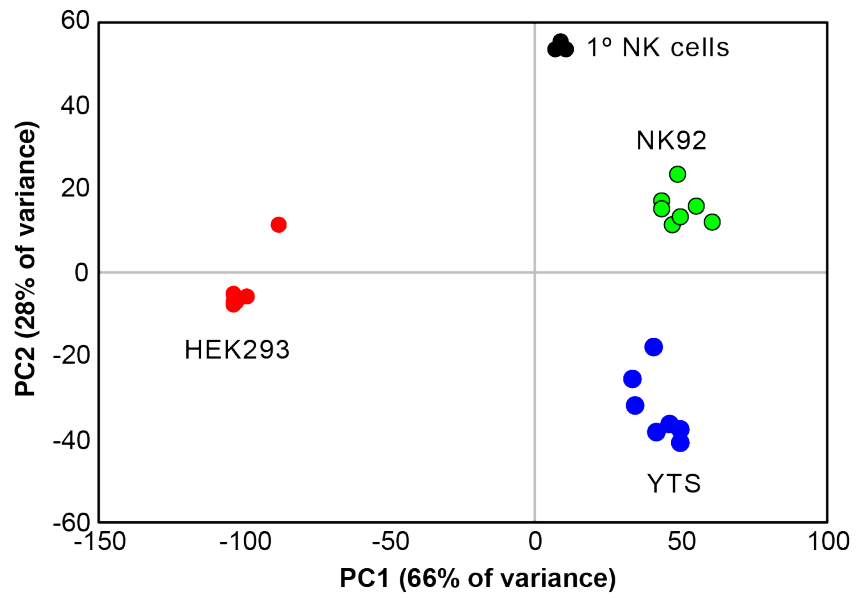

**Figure S3.** The four different cell types cluster based on the top two principle components of the RNA-Seq analysis.

# Glycopeptide mass spectrometry parameter file

## Method of Q Exactive

### OVERALL METHOD SETTINGS

|                             |           |
|-----------------------------|-----------|
| Global Settings             |           |
| Use lock masses             | best      |
| Lock mass injection         | -         |
| Chrom. peak width (FWHM)    | 10 s      |
| Time                        |           |
| Method duration             | 80.00 min |
| Customized Tolerances (+/-) |           |
| Lock Masses                 | -         |
| Inclusion                   | -         |
| Exclusion                   | 10.0 ppm  |
| Neutral Loss                | -         |
| Mass Tags                   | -         |
| Dynamic Exclusion           | -         |

### Experiment

#### FULL MS / DD-MS<sup>2</sup> (TOPN)

|                             |                          |
|-----------------------------|--------------------------|
| General                     |                          |
| Runtime                     | 0 to 80 min              |
| Polarity                    | Positive                 |
| In-source CID               | 0.0 eV                   |
| Default charge state        | 2                        |
| Inclusion                   | -                        |
| Exclusion                   | on                       |
| Tags                        | -                        |
| Full MS                     |                          |
| Microscans                  | 1                        |
| Resolution                  | 70,000                   |
| AGC target                  | 5e5                      |
| Maximum IT                  | 80 ms                    |
| Number of scan ranges       | 1                        |
| Scan range                  | 600 to 2500 m/z          |
| Spectrum data type          | Profile                  |
| dd-MS <sup>2</sup> / dd-SIM |                          |
| Microscans                  | 1                        |
| Resolution                  | 17,500                   |
| AGC target                  | 2e5                      |
| Maximum IT                  | 120 ms                   |
| Loop count                  | 20                       |
| MSX count                   | 1                        |
| TopN                        | 20                       |
| Isolation window            | 2.0 m/z                  |
| Isolation offset            | 0.0 m/z                  |
| Scan range                  | 200 to 2000 m/z          |
| Fixed first mass            | -                        |
| (N)CE / stepped (N)CE       | nce: 17, 27, 37          |
| Spectrum data type          | Profile                  |
| dd Settings                 |                          |
| Minimum AGC target          | 2.00e3                   |
| Intensity threshold         | 1.7e4                    |
| Apex trigger                | -                        |
| Charge exclusion            | unassigned, 1, 6 - 8, >8 |
| Peptide match               | Off                      |
| Exclude isotopes            | on                       |
| Dynamic exclusion           | -                        |
| If idle ..                  | do not pick others       |



## Setup

### TUNEFILES

#### General

Switch Count 0

Base Tunefile C:\Xcalibur\methods\Nano\_packedEmitter.mstune

### CONTACT CLOSURE

#### General

Used False

Start in Closed True

Switch Count 0

### SYRINGE

#### General

Used False

Start in OFF True

Stop at end of run False

Switch Count 0

#### Pump setup

Syringe type Hamilton

Flow rate 3.000  $\mu\text{L}/\text{min}$

Inner diameter 2.303 mm

Volume 250  $\mu\text{L}$

### DIVERT VALVE A

#### General

Used False

Start in 1-2 True

Switch Count 0

### DIVERT VALVE B

#### General

Used False

Start in 1-2 True

Switch Count 0

### LOCK MASSES

(no entries)

### INCLUSION LIST

(no entries)

### EXCLUSION LIST

41 entries

| Mass       | Formula | Species | CS  | Polarity | Start | End   | Comment |
|------------|---------|---------|-----|----------|-------|-------|---------|
| [m/z]      | [M]     |         | [z] |          | [min] | [min] |         |
| 1022.00000 |         |         | 1   | Positive | 0     | 80.00 |         |
| 1122.00000 |         |         | 1   | Positive | 0     | 80.00 |         |
| 1221.99000 |         |         | 1   | Positive | 0     | 80.00 |         |
| 1321.99000 |         |         | 1   | Positive | 0     | 80.00 |         |
| 1421.99000 |         |         | 1   | Positive | 0     | 80.00 |         |
| 1521.99000 |         |         | 1   | Positive | 0     | 80.00 |         |
| 1621.99000 |         |         | 1   | Positive | 0     | 80.00 |         |
| 708.51000  |         |         | 1   | Positive | 0     | 80.00 |         |
| 736.54000  |         |         | 1   | Positive | 0     | 80.00 |         |
| 633.45000  |         |         | 1   | Positive | 0     | 80.00 |         |
| 314.12000  |         |         | 1   | Positive | 0     | 80.00 |         |
| 530.35000  |         |         | 1   | Positive | 0     | 80.00 |         |
| 358.20000  |         |         | 1   | Positive | 0     | 80.00 |         |
| 291.04000  |         |         | 1   | Positive | 0     | 80.00 |         |
| 294.00000  |         |         | 1   | Positive | 0     | 80.00 |         |

|           |            |         |
|-----------|------------|---------|
| 316.12000 | 1 Positive | 0 80.00 |
| 338.34000 | 1 Positive | 0 80.00 |
| 358.20000 | 1 Positive | 0 80.00 |
| 376.26000 | 1 Positive | 0 80.00 |
| 387.19000 | 1 Positive | 0 80.00 |
| 390.14000 | 1 Positive | 0 80.00 |
| 404.22000 | 1 Positive | 0 80.00 |
| 421.32000 | 1 Positive | 0 80.00 |
| 432.25000 | 1 Positive | 0 80.00 |
| 460.28000 | 1 Positive | 0 80.00 |
| 472.28000 | 1 Positive | 0 80.00 |
| 508.27000 | 1 Positive | 0 80.00 |
| 528.34000 | 1 Positive | 0 80.00 |
| 551.63000 | 1 Positive | 0 80.00 |
| 565.57000 | 1 Positive | 0 80.00 |
| 610.62000 | 1 Positive | 0 80.00 |
| 663.45000 | 1 Positive | 0 80.00 |
| 684.20000 | 1 Positive | 0 80.00 |
| 758.22000 | 1 Positive | 0 80.00 |
| 761.22000 | 1 Positive | 0 80.00 |
| 293.20000 | 1 Positive | 0 80.00 |
| 550.63000 | 1 Positive | 0 80.00 |
| 680.48000 | 1 Positive | 0 80.00 |
| 269.06000 | 1 Positive | 0 80.00 |
| 436.34000 | 1 Positive | 0 80.00 |
| 313.14000 | 1 Positive | 0 80.00 |

NEUTRAL LOSSES  
(no entries)

MASS TAGS  
(no entries)

**Peptide mass spectrometry parameter file**

Method of Q Exactive

OVERALL METHOD SETTINGS

|                             |           |
|-----------------------------|-----------|
| Global Settings             |           |
| Use lock masses             | best      |
| Lock mass injection         | -         |
| Chrom. peak width (FWHM)    | 10 s      |
| Time                        |           |
| Method duration             | 80.00 min |
| Customized Tolerances (+/-) |           |
| Lock Masses                 | -         |
| Inclusion                   | -         |
| Exclusion                   | 10.0 ppm  |
| Neutral Loss                | -         |
| Mass Tags                   | -         |
| Dynamic Exclusion           | -         |

Experiment

|                                     |             |
|-------------------------------------|-------------|
| FULL MS / DD-MS <sup>2</sup> (TOPN) |             |
| General                             |             |
| Runtime                             | 0 to 80 min |
| Polarity                            | Positive    |
| In-source CID                       | 0.0 eV      |
| Default charge state                | 2           |
| Inclusion                           | -           |

|                             |                          |
|-----------------------------|--------------------------|
| Exclusion                   | on                       |
| Tags                        | -                        |
| Full MS                     |                          |
| Microscans                  | 1                        |
| Resolution                  | 70,000                   |
| AGC target                  | 5e5                      |
| Maximum IT                  | 80 ms                    |
| Number of scan ranges       | 1                        |
| Scan range                  | 266 to 2500 m/z          |
| Spectrum data type          | Profile                  |
| dd-MS <sup>2</sup> / dd-SIM |                          |
| Microscans                  | 1                        |
| Resolution                  | 17,500                   |
| AGC target                  | 2e5                      |
| Maximum IT                  | 120 ms                   |
| Loop count                  | 20                       |
| MSX count                   | 1                        |
| TopN                        | 20                       |
| Isolation window            | 2.0 m/z                  |
| Isolation offset            | 0.0 m/z                  |
| Scan range                  | 200 to 2000 m/z          |
| Fixed first mass            | -                        |
| (N)CE / stepped (N)CE       | nce: 27                  |
| Spectrum data type          | Profile                  |
| dd Settings                 |                          |
| Minimum AGC target          | 2.00e3                   |
| Intensity threshold         | 1.7e4                    |
| Apex trigger                | -                        |
| Charge exclusion            | unassigned, 1, 6 - 8, >8 |
| Peptide match               | Off                      |
| Exclude isotopes            | on                       |
| Dynamic exclusion           | -                        |
| If idle ..                  | do not pick others       |

Setup

TUNEFILES

General

Switch Count 0

Base Tunefile C:\Xcalibur\methods\Nano\_packedEmitter.mstune

CONTACT CLOSURE

General

Used False

Start in Closed True

Switch Count 0

SYRINGE

General

Used False

Start in OFF True

Stop at end of run False

Switch Count 0

Pump setup

Syringe type Hamilton

Flow rate 3.000  $\mu$ L/min

Inner diameter 2.303 mm

Volume 250  $\mu$ L

DIVERT VALVE A

General

Used False

Start in 1-2 True

Switch Count 0

DIVERT VALVE B

General

Used False

Start in 1-2 True

Switch Count 0

LOCK MASSES

(no entries)

INCLUSION LIST

(no entries)

EXCLUSION LIST

41 entries

| Mass       | Formula | Species | CS  | Polarity | Start | End   | Comment |
|------------|---------|---------|-----|----------|-------|-------|---------|
| [m/z]      | [M]     |         | [z] |          | [min] | [min] |         |
| 1022.00000 |         |         | 1   | Positive | 0     | 80.00 |         |
| 1122.00000 |         |         | 1   | Positive | 0     | 80.00 |         |
| 1221.99000 |         |         | 1   | Positive | 0     | 80.00 |         |
| 1321.99000 |         |         | 1   | Positive | 0     | 80.00 |         |
| 1421.99000 |         |         | 1   | Positive | 0     | 80.00 |         |
| 1521.99000 |         |         | 1   | Positive | 0     | 80.00 |         |
| 1621.99000 |         |         | 1   | Positive | 0     | 80.00 |         |
| 708.51000  |         |         | 1   | Positive | 0     | 80.00 |         |
| 736.54000  |         |         | 1   | Positive | 0     | 80.00 |         |
| 633.45000  |         |         | 1   | Positive | 0     | 80.00 |         |
| 314.12000  |         |         | 1   | Positive | 0     | 80.00 |         |
| 530.35000  |         |         | 1   | Positive | 0     | 80.00 |         |
| 358.20000  |         |         | 1   | Positive | 0     | 80.00 |         |
| 291.04000  |         |         | 1   | Positive | 0     | 80.00 |         |
| 294.00000  |         |         | 1   | Positive | 0     | 80.00 |         |
| 316.12000  |         |         | 1   | Positive | 0     | 80.00 |         |
| 338.34000  |         |         | 1   | Positive | 0     | 80.00 |         |
| 358.20000  |         |         | 1   | Positive | 0     | 80.00 |         |
| 376.26000  |         |         | 1   | Positive | 0     | 80.00 |         |
| 387.19000  |         |         | 1   | Positive | 0     | 80.00 |         |
| 390.14000  |         |         | 1   | Positive | 0     | 80.00 |         |
| 404.22000  |         |         | 1   | Positive | 0     | 80.00 |         |
| 421.32000  |         |         | 1   | Positive | 0     | 80.00 |         |
| 432.25000  |         |         | 1   | Positive | 0     | 80.00 |         |
| 460.28000  |         |         | 1   | Positive | 0     | 80.00 |         |
| 472.28000  |         |         | 1   | Positive | 0     | 80.00 |         |
| 508.27000  |         |         | 1   | Positive | 0     | 80.00 |         |
| 528.34000  |         |         | 1   | Positive | 0     | 80.00 |         |
| 551.63000  |         |         | 1   | Positive | 0     | 80.00 |         |
| 565.57000  |         |         | 1   | Positive | 0     | 80.00 |         |
| 610.62000  |         |         | 1   | Positive | 0     | 80.00 |         |
| 663.45000  |         |         | 1   | Positive | 0     | 80.00 |         |
| 684.20000  |         |         | 1   | Positive | 0     | 80.00 |         |
| 758.22000  |         |         | 1   | Positive | 0     | 80.00 |         |
| 761.22000  |         |         | 1   | Positive | 0     | 80.00 |         |
| 293.20000  |         |         | 1   | Positive | 0     | 80.00 |         |
| 550.63000  |         |         | 1   | Positive | 0     | 80.00 |         |
| 680.48000  |         |         | 1   | Positive | 0     | 80.00 |         |
| 269.06000  |         |         | 1   | Positive | 0     | 80.00 |         |
| 436.34000  |         |         | 1   | Positive | 0     | 80.00 |         |
| 313.14000  |         |         | 1   | Positive | 0     | 80.00 |         |

NEUTRAL LOSSES

(no entries)

MASS TAGS  
(no entries)
